# Supplementary material
Source: PubMed Central journal article supplement (PMC7414799)
Supplement: Supp_TableS1.pdf [file Supp_TableS1.pdf]

## Supplementary Data

SUPPLEMENTARY TABLE S1. PCR CONDITIONS AND PRIMERS OF MEASURED TOXINS

| <i>Gene</i>            | <i>Primer</i> | <i>Sequence</i>                           | <i>PCR conditions</i>                                                         |
|------------------------|---------------|-------------------------------------------|-------------------------------------------------------------------------------|
| <i>sea</i>             | F             | GCA GGG AAC AGC TTT AGG C                 | 95°C/5 min, 35 cycles: 95°C/1 min,<br>63°C/45 s, 72°C/1 min,<br>72°C/10 min   |
|                        | R             | GTT CTG TAG AAG TAT GAA ACA CG            |                                                                               |
| <i>seb</i>             | F             | ACA TGT AAT TTT GAT ATT CGC ACT G         |                                                                               |
|                        | R             | TGC AGG CAT CAT GTC ATA CCA               |                                                                               |
| <i>sec</i>             | F             | CTT GTA TGT ATG GAG GAA TAA CAA           |                                                                               |
|                        | R             | TGC AGG CAT CAT ATC ATA CCA               |                                                                               |
| <i>sed</i>             | F             | GTG GTG AAA TAG ATA GGA CTG C             |                                                                               |
|                        | R             | ATA TGA AGG TGC TCT GTG G                 |                                                                               |
| <i>see</i>             | F             | TAC CAA TTA ACT TGT GGA TAG AC            |                                                                               |
|                        | R             | CTC TTT GCA CCT TAC CGC                   |                                                                               |
| <i>seg</i>             | F             | CGT CTC CAC CTG TTG AAG G                 |                                                                               |
|                        | R             | CCA AGT GAT TGT CTA TTG TCG               |                                                                               |
| <i>seh</i>             | F             | CAA CTG CTG ATT TAG CTC AG                |                                                                               |
|                        | R             | GTC GAA TGA GTA ATC TCT AGG               |                                                                               |
| <i>sei</i>             | F             | CAA CTC GAA TTT TCA ACA GGT ACC           |                                                                               |
|                        | R             | CAG GCA GTC CAT CTC CTG                   |                                                                               |
| <i>sej</i>             | F             | CAT CAG AAC TGT TGT TCC GCT AG            |                                                                               |
|                        | R             | CTG AAT TTT ACC ATC AAA GGT AC            |                                                                               |
| <i>sek</i>             | F             | GAA TTA CGT TGG CGA ATC                   |                                                                               |
|                        | R             | AGG GTA GGC GGG C                         |                                                                               |
| <i>sel</i>             | F             | CAT ACA GTC TTA TCT AAC GG                |                                                                               |
|                        | R             | TTT TCT GCT TTA GTA ACA CC                |                                                                               |
| <i>sem</i>             | F             | CTA TTA ATC TTT GGG TTA ATG GAG AAC       |                                                                               |
|                        | R             | TTC AGT TTC GAC AGT TTT GTT GTC AT        |                                                                               |
| <i>sen</i>             | F             | CTT CTT GTT GGA CAC CAT CTT               |                                                                               |
|                        | R             | GAA ATA AAT GTG TAG GCT T                 |                                                                               |
| <i>seo</i>             | F             | AAA TTC AGC AGA TAT TCC AT                |                                                                               |
|                        | R             | TTT GTG TAA GAA GTC AAG TGT AG            |                                                                               |
| <i>sep</i>             | F             | ATC ATA ACC AAC CGA ATC AC                |                                                                               |
|                        | R             | AGA AGT AAC TGT TCA GGA GCT A             |                                                                               |
| <i>ser</i>             | F             | AGA TGT GTT TGG AAT ACC CTA T             |                                                                               |
|                        | R             | CTA TCA GCT GTG GAG TGC AT                |                                                                               |
| <i>seq</i>             | F             | TCA GGT CTT TGT AAT ACA AAA               |                                                                               |
|                        | R             | TCT GCT TGA CCA GTT CCG GT                |                                                                               |
| <i>seu</i>             | F             | ATT TGC TTT TAT CTT CAT                   |                                                                               |
|                        | R             | GGA CTT TAA TGT TTG TTT CTG AT            |                                                                               |
| <i>tst</i>             | F             | GCT TGC GAC AAC TGC TAC AG                |                                                                               |
|                        | R             | TGG ATC CGT CAT TCA TTG TTA T             |                                                                               |
| <i>eta</i>             | F             | CTA TTT ACT GTA GGA GCT AG                | 94°C/4 min, 35 cycles: 94°C/1 min,<br>52°C/1.5 min, 72°C/1 min,<br>72°C/7 min |
|                        | R             | ATT TAT TTG ATG CTC TCT AT                |                                                                               |
| <i>etb</i>             | F             | ACG GCT ATA TAC ATT CAA TT                |                                                                               |
|                        | R             | TCC ATC GAT AAT ATA CCT AA                |                                                                               |
| <i>etd</i>             | F             | AAC TAT CAT GTA TCA AGG                   |                                                                               |
|                        | R             | CAG AAT TTC CCG ACT CAG                   |                                                                               |
| <i>lukS/<br/>F-PVL</i> | F             | ATC ATT AGG TAA AAT GCT TGG ACA TGA TCC A | 94°C/4 min, 30 cycles: 94°C/45 s,<br>60.5°C/45 s, 72°C/1 min,<br>72°C/2 min   |
|                        | R             | GCA TCA AST GTA TTG GAT AGC AAA AGC       |                                                                               |

*eta-b-d*, exfoliative toxins (a, b, and d); *lukS/F-PVL*, Pantón–Valentine leukocidin; *sea-u*, enterotoxins (a–u); *tst*, toxic shock syndrome toxin.
